# Supplementary material for: Lysine-14 acetylation of histone H3 in chromatin confers resistance to the deacetylase and demethylase activities of an epigenetic silencing complex
Source: eLife journal article supplement (doi:10.7554/elife.37231), 2018-06-05
Supplement: supp [file elife-37231-supp-v1.zip]

Archive with 13 entries (13 files):
- elife_poa_e37231_Figure_6_figure_supplement_1.jpg
- elife_poa_e37231_Figure_2_figure_supplement_2.jpg
- elife_poa_e37231_Figure_4_figure_supplement_2.jpg
- elife_poa_e37231_Figure_2_figure_supplement_3.jpg
- elife_poa_e37231_Figure_7_figure_supplement_1.jpg
- elife_poa_e37231_Figure_4_figure_supplement_1.jpg
- elife_poa_e37231_Figure_3_figure_supplement_1.jpg
- elife_poa_e37231_Transparent_Reporting_File.pdf
- elife_poa_e37231_Figure_4_figure_supplement_4.jpg
- elife_poa_e37231_Figure_5_figure_supplement_1.jpg
- elife_poa_e37231_Figure_4_figure_supplement_3.jpg
- elife_poa_e37231_Figure_2_figure_supplement_1.jpg
- elife_poa_e37231_Figure_6_figure_supplement_2.jpg
